# Supplementary material for: Strategies to identify individuals with monogenic diabetes: results of an economic evaluation
Source: PubMed Central journal article supplement (PMC7150598; doi:10.1136/bmjopen-2019-034716), 2020-03-18
Supplement: bmjopen-2019-034716supp003.pdf [file bmjopen-2019-034716supp003.pdf]

### Supplementary Data 3: Test-related parameters

**Table 3A Summary of the tests involved and estimates of sensitivity and specificity used in the economic evaluation**

| Test-treatment strategy           | Tests used                                         | Sensitivity | Specificity  | Data sources                                                                                                                                                             |
|-----------------------------------|----------------------------------------------------|-------------|--------------|--------------------------------------------------------------------------------------------------------------------------------------------------------------------------|
| Ad Hoc Testing                    | Clinical referral based on patient characteristics | 0.04        | 0.996        | Shields et al <sup>1</sup> ; 2011 census data; Clinical study; Unpublished prevalence data                                                                               |
|                                   | Genetic test                                       | 1           | 1            | Assumption                                                                                                                                                               |
| Clinical Prediction Model Testing | Type 1 clinical prediction model                   | 0.5 - 0.96  | 0.65 - 0.996 | Shields et al <sup>2</sup> . Estimates of sensitivity and specificity depend on the combination of the probability thresholds used from both clinical prediction models. |
|                                   | Type 2 clinical prediction model                   | 0.8 - 0.99  | 0.73 - 0.99  | Shields et al <sup>2</sup> . Estimates of sensitivity and specificity depend on the combination of the probability thresholds used from both clinical prediction models. |
|                                   | Genetic test                                       | 1           | 1            | Assumption                                                                                                                                                               |
| Biomarker Testing                 | UCPCR test                                         | 0.94        | 0.96         | Besser et al <sup>3</sup>                                                                                                                                                |
|                                   | Autoantibody test                                  | 0.99        | 0.82         | McDonald et al <sup>4</sup>                                                                                                                                              |
|                                   | Genetic test                                       | 1           | 1            | Assumption                                                                                                                                                               |
| All Testing                       | Genetic test                                       | 1           | 1            | Assumption                                                                                                                                                               |

UCPCR, urinary c-peptide to creatinine ratio

Table 3B Sensitivity and specificity of the Ad Hoc Testing strategy by regions in the UK

| Region                        | Sensitivity | Specificity |
|-------------------------------|-------------|-------------|
| Northern Ireland <sup>a</sup> | 0.038       | 0.996       |
| Wales                         | 0.044       | 0.998       |
| Scotland                      | 0.132       | 0.988       |
| England                       | 0.086       | 0.993       |
| South West England            | 0.196       | 0.977       |
| South East England            | 0.080       | 0.995       |
| London                        | 0.049       | 0.995       |
| East England                  | 0.060       | 0.996       |
| West Midlands England         | 0.077       | 0.994       |
| East Midlands England         | 0.074       | 0.995       |
| Yorkshire/Humberside England  | 0.084       | 0.996       |
| North East England            | 0.122       | 0.994       |
| North West England            | 0.074       | 0.995       |
| UK                            | 0.087       | 0.993       |
| England and Wales             | 0.084       | 0.993       |

<sup>a</sup>Used in base case analysis

## References

1. Shields BM, Hicks S, Shepherd MH, et al. Maturity-onset diabetes of the young (MODY): how many cases are we missing? *Diabetologia* 2010;53:2504-08.
2. Shields BM, McDonald TJ, Ellard S, et al. The development and validation of a clinical prediction model to determine the probability of MODY in patients with young-onset diabetes. *Diabetologia* 2012 [published Online First: 5th January 2012]
3. Besser REJ, Shepherd MH, McDonald TJ, et al. Urinary c-peptide-to-creatinine ratio is a practical outpatient tool for identifying hepatocyte nuclear factor 1- $\alpha$ /hepatocyte nuclear factor 4- $\alpha$  maturity-onset diabetes of the young from long-duration type 1 diabetes. *Diabetes Care* 2011;34:1-6.
4. McDonald TJ, Colclough K, Brown R, et al. Islet autoantibodies can discriminate maturity-onset diabetes of the young (MODY) from type 1 diabetes. *Diabetic Medicine* 2011;28:1028-33.
