# Supplementary material for: Strategies to identify individuals with monogenic diabetes: results of an economic evaluation
Source: PubMed Central journal article supplement (PMC7150598; doi:10.1136/bmjopen-2019-034716), 2020-03-18
Supplement: bmjopen-2019-034716supp004.pdf [file bmjopen-2019-034716supp004.pdf]

## Supplementary Data 4: Cost parameters

**Table 4A Summary of the costs considered for each strategy**

|                                                       | No Testing | Ad Hoc Testing | Clinical Prediction Model Testing | Biomarker Testing | All Testing |
|-------------------------------------------------------|------------|----------------|-----------------------------------|-------------------|-------------|
| Diabetes-specific consultations                       | ○          | ○              | ○                                 | ○                 | ○           |
| Current treatment                                     | ○          | ○              | ○                                 | ○                 | ○           |
| HBGM on current treatment                             | ○          | ○              | ○                                 | ○                 | ○           |
| Blood test (for genetic test or autoantibody testing) |            | ○              | ○                                 | ○                 | ○           |
| UCPCR test                                            |            |                |                                   | ○                 |             |
| Autoantibody test                                     |            |                |                                   | ○                 |             |
| Genetic test                                          |            | ○              | ○                                 | ○                 | ○           |
| Treatment transfer assistance <sup>a</sup>            |            | ○              | ○                                 | ○                 | ○           |
| New treatment                                         |            | ○              | ○                                 | ○                 | ○           |
| HBGM on new treatment                                 |            | ○              | ○                                 | ○                 | ○           |
| Long-term management                                  | ○          | ○              | ○                                 | ○                 | ○           |

<sup>a</sup>Includes telephone calls with nurse and visit(s) to GP for changes in treatment during 12 month follow-up. UCPCR, urinary c-peptide to creatinine ratio; HBGM, home blood glucose monitoring

**Table 4B Costs of testing associated with the strategies**

| Cost                                                                      | Value (£, 2018) | Source                                                                                                |
|---------------------------------------------------------------------------|-----------------|-------------------------------------------------------------------------------------------------------|
| GP nurse time for collecting blood sample                                 | £6              | 10 minutes at £36 per 1hr GP nurse patient contact time <sup>1</sup>                                  |
| Genetic test for GCK mutation                                             | £350            | Sanger sequence analysis from UK referral centre <sup>2</sup>                                         |
| Genetic test for HNF1/4A mutation                                         | £450            | Sanger sequence analysis from UK referral centre <sup>2</sup>                                         |
| Genetic test for known mutation                                           | £100            | Sanger sequence analysis from UK referral centre <sup>2</sup>                                         |
| Nurse time for successful treatment transfer                              | £24             | Four 10 minute phone calls (expert opinion) at £36 per 1hr GP nurse patient contact time <sup>1</sup> |
| GP time for informing patient of genetic test result and treatment change | £28             | Cost of GP consultation <sup>1</sup>                                                                  |
| UCPCR pack                                                                | £3.90           | Postage                                                                                               |
| UCPCR test                                                                | £10.50          | RD&E laboratory <sup>2</sup>                                                                          |
| Autoantibody test                                                         | £20             | RD&E laboratory <sup>2</sup>                                                                          |

UCPCR, urinary c-peptide to creatinine ratio

Table 4C Cost estimates (£, 2018) used in the IMS CDM model

| Event                                                                         | Cost (£, 2018) | Source                                                         |
|-------------------------------------------------------------------------------|----------------|----------------------------------------------------------------|
| <b>CVD complications</b>                                                      |                |                                                                |
| Myocardial infarction (MI) in 1st year of MI                                  | £7,550         | Clarke <sup>3</sup>                                            |
| Second and subsequent yrs after an MI                                         | £1,250         | Clarke <sup>3</sup>                                            |
| Angina in 1st year of angina                                                  | £250           | Ward <sup>4</sup>                                              |
| Second and subsequent yrs after an angina                                     | £200           | Ward <sup>4</sup>                                              |
| Congestive heart failure (CHF) in 1st year of CHF                             | £3,500         | Clarke <sup>5</sup>                                            |
| Second and subsequent yrs after a CHF                                         | £500           | Clarke <sup>5</sup>                                            |
| Stroke in 1st year of stroke                                                  | £4,600         | Clarke <sup>3</sup>                                            |
| Second and subsequent yrs after a stroke                                      | £850           | Clarke <sup>3</sup>                                            |
| Stroke death within 30 days of stroke                                         | £6,350         | Clarke <sup>3</sup>                                            |
| Peripheral vascular disease (PVD) in 1st year of PVD                          | £1,150         | Clarke <sup>5</sup>                                            |
| Second and subsequent yrs after a PVD                                         | £450           | Clarke <sup>5</sup>                                            |
| <b>Renal complications</b>                                                    |                |                                                                |
| Hemodialysis in 1st year of needing hemodialysis                              | £43,500        | Baboolal <sup>6</sup>                                          |
| Hemodialysis in second & subsequent yrs of needing hemodialysis               | £43,500        | Baboolal <sup>6</sup>                                          |
| Peritoneal dialysis in 1st year of needing peritoneal dialysis                | £24,250        | Baboolal <sup>6</sup>                                          |
| Peritoneal dialysis in second & subsequent yrs of needing peritoneal dialysis | £24,250        | Baboolal <sup>6</sup>                                          |
| Renal transplant in 1st year of needing renal transplant                      | £13,100        | NHS Schedule Reference costs <sup>7</sup> ; Wight <sup>8</sup> |
| Renal transplant in second & subsequent yrs of needing renal transplant       | £7,050         | Wight <sup>8</sup>                                             |
| <b>Acute events</b>                                                           |                |                                                                |
| Major hypoglycaemic event                                                     | £200           | Hammer <sup>9</sup>                                            |
| Minor hypoglycaemic event                                                     | £0             | Would not require medical assistance                           |
| Ketoacidosis event                                                            | £1,250         | Scuffham <sup>10</sup>                                         |
| Lactic acid event                                                             | £2,500         | Curtis <sup>11</sup>                                           |
| Edema onset                                                                   | £50            | Curtis <sup>11</sup>                                           |
| Edema follow-up                                                               | £0             | Assume no follow-up                                            |
| <b>Eye disease</b>                                                            |                |                                                                |
| Laser treatment                                                               | £100           | NHS Schedule Reference costs <sup>7</sup>                      |
| Cataract operation                                                            | £800           | NHS Schedule Reference costs <sup>7</sup>                      |
| Following cataract operation                                                  | £550           | Clarke <sup>3</sup>                                            |
| Blindness in the yr of onset                                                  | £7,250         | Mitchell <sup>12</sup>                                         |
| Blindness in the following yrs                                                | £7,250         | Mitchell <sup>12</sup>                                         |
| <b>Neuropathy/foot ulcer</b>                                                  |                |                                                                |
| Neuropathy in the first yr                                                    | £150           | BNF <sup>13</sup>                                              |
| Neuropathy in subsequent yrs                                                  | £150           | BNF <sup>13</sup>                                              |
| Amputation (one-off cost)                                                     | £7,950         | Kerr <sup>14</sup>                                             |

|                                                  |        |                                             |
|--------------------------------------------------|--------|---------------------------------------------|
| Amputation prosthesis (one-off cost)             | £3,200 | Kerr <sup>14</sup>                          |
| Gangrene treatment                               | £2,700 |                                             |
| After a healed ulcer                             | £0     | Assumption                                  |
| Infected ulcer                                   | £4,050 | Kerr <sup>14</sup>                          |
| Standard uninfected ulcer                        | £4,050 | Kerr <sup>14</sup>                          |
| Healed ulcer in those with an amputation history | £0     | Assumption                                  |
| <b>Other</b>                                     |        |                                             |
| Statins                                          | £0     | NICE guidance and BNF <sup>13</sup>         |
| Aspirin                                          | £0     | NICE guidance and BNF <sup>13</sup>         |
| Angiotensin-converting enzyme (ACE)              | £0     | BNF                                         |
| Screening for microalbuminuria                   | £0     | NICE <sup>15</sup>                          |
| Screening for gross proteinuria                  | £0     | Assume as for MA                            |
| Stopping ACEs due to side effects                | £0     | Assumptions                                 |
| Eye screening                                    | £50    | NICE <sup>15</sup>                          |
| Foot screening programme                         | £100   | NICE <sup>16</sup> and Curtis <sup>17</sup> |
| Non-standard ulcer treatment (e.g. Regranex)     | £0     | Assumptions                                 |
| Anti-depression treatment                        | £0     | Assumptions                                 |
| Screening for depression                         | £0     | Assumptions                                 |

Table 4D Annual number of primary care consultations (taken from Currie et al 2010<sup>18</sup>)

| Type of consultation          | Type 1 | Type 2 | Type 1 control | Type 2 control | Cost per consultation |
|-------------------------------|--------|--------|----------------|----------------|-----------------------|
| GP surgery                    | 7.3    | 8.7    | 4.5            | 5.4            | £34                   |
| GP home visit                 | 0.3    | 0.6    | 0.1            | 0.4            | £41                   |
| GP telephone                  | 0.5    | 0.7    | 0.3            | 0.4            | £20                   |
| Community nurse clinic        | 0.9    | 1.5    | 0.3            | 0.6            | £12                   |
| Total cost                    | £278   | £349   | £165           | £213           |                       |
| Additional cost over controls | £113   | £136   |                |                |                       |

## References

1. Curtis LA, Burns A. Unit costs of health and social care 2017: Personal Social Services Research Unit, University of Kent, 2017.
2. Royal Devon and Exeter NHS Foundation Trust. [Available from: [http://www.rdehospital.nhs.uk/prof/molecular\\_genetics/tests/Full\\_Test\\_List.htm](http://www.rdehospital.nhs.uk/prof/molecular_genetics/tests/Full_Test_List.htm) accessed 13th October 2014.
3. Clarke P, Gray A, Legood R, et al. The impact of diabetes-related complications on healthcare costs: results from the United Kingdom Prospective Diabetes Study (UKPDS 65). *Diabetic Medicine* 2003;20:442-50.
4. Ward S, Lloyd Jones M, Pandor A, et al. Statins for the prevention of coronary events. Technology assessment report commissioned by the HTA programme on behalf of the National Institute for Clinical Excellence, 2005.
5. Clarke PM, Glasziou P, Patel A, et al. Event rates, hospital utilization, and costs associated with major complications of diabetes: a multicountry comparative analysis. *PLoS Medicine* 2010;7(2)
6. Baboolal K, McEwan P, Sondhi S, et al. The cost of renal dialysis in a UK setting - a multicentre study. *Nephrology Dialysis Transplantation* 2008;23(6):1982-89.
7. Department of Health. National Schedule of Reference Costs 2012-2013, 2013.
8. Wight J, Chilcott J, Holmes M, et al. The clinical and cost-effectiveness of pulsatile machine perfusion versus cold storage of kidneys for transplantation retrieved from heart-beating and non-heart-beating donors. *Health Technology Assessment* 2003;7(25)
9. Hammer M, Lammert M, Mejias SM, et al. Costs of managing severe hypoglycaemia in three European countries. *Journal of Medical Economics* 2009;12(4)
10. Scuffham P, Carr L. The cost-effectiveness of continuous subcutaneous insulin infusion compared with multiple daily injections for the management of diabetes. *Diabetic Medicine* 2003;20(7):586-93.
11. Curtis L. Unit Costs of Health and Social Care 2013, 2013.
12. Mitchell P, Annemans L, Gallagher M, et al. Cost-effectiveness of ranibizumab in treatment of diabetic macular oedema (DME) causing vision impairment: evidence from the RESTORE trial. *British Journal of Ophthalmology* 2011;early online
13. British National Formulary 67. BNF 67 (May 2014) 2014 [
14. Kerr M. Foot care for people with diabetes: the economic case for change: NHS Diabetes, 2012.
15. National Institute for Health and Clinical Excellence. Quality Standards Programme. NICE cost impact and commissioning assessment for diabetes in adults, 2011.
16. National Institute for Health and Clinical Excellence. Diabetes footcare commissioning and benchmarking tool, 2012.
17. Curtis L. Unit Costs of Health and Social Care 2011: PSSRU, 2012.
18. Currie CJ, Gale EAM, Poole CD. Estimation of primary care treatment costs and treatment efficacy for people with type 1 and Type 2 diabetes in the United Kingdom from 1997 to 2007. *Diabetic Medicine* 2010;27(8):938-48.
